# Supplementary material
Source: publisher figshare collection journal article supplement (https://gsajournals.figshare.com/ndownloader/files/26384560)
Supplement: Supplementary file 1 [file 26384560]

## Sheet: S5. Hyr.Iff
Supplementary table 5. Candida auris B8441 Hyr/Iff proteins conserved domains
# Hyr/Iff proteins absent in B11220
B9J08_001531T0	Length	1375
B9J08_001531T0	Pfam	PF11765	Hyphally-regulated cell wall protein, N-terminal	9	323
B9J08_001531T0	Pfam	PF15789	Hyphally regulated cell wall GPI-anchored protein 1	825	868
B9J08_001531T0	Pfam	PF15789	Hyphally regulated cell wall GPI-anchored protein 1	471	512
B9J08_001531T0	Pfam	PF15789	Hyphally regulated cell wall GPI-anchored protein 1	416	461
B9J08_001531T0	SignalP_EUK	SignalP-noTM	Secreted signal	1	17
B9J08_001531T0	eTandem	eTandem-ITR	intragenic tandem repeats	579.667	987.333
B9J08_001531T0	GPI-anchor	GPI-anchor	GPI-anchoring signal omega site	1350	1375
B9J08_004098T0	Length	1247
B9J08_004098T0	Pfam	PF11765	Hyphally regulated cell wall protein N-terminal	14	326
B9J08_004098T0	ProSiteProfiles	PS50853	Fibronectin type-III domain profile.	365	472
B9J08_004098T0	ProSiteProfiles	PS50853	Fibronectin type-III domain profile.	794	900
B9J08_004098T0	ProSiteProfiles	PS50853	Fibronectin type-III domain profile.	607	711
B9J08_004098T0	SignalP_EUK	SignalP-TM	Secreted signal	1	20
B9J08_004098T0	eTandem	eTandem-ITR	intragenic tandem repeats	576.333	760
B9J08_004098T0	eTandem	eTandem-ITR	intragenic tandem repeats	823.333	958
B9J08_004098T0	GPI-anchor		GPI-anchoring signal omega site	1222	1247
B9J08_004100T0	Length	760
B9J08_004100T0	Pfam	PF11765	Hyphally regulated cell wall protein N-terminal	12	325
B9J08_004100T0	SignalP_EUK	SignalP-noTM	Secreted signal	1	19
B9J08_004100T0	eTandem	eTandem-ITR	intragenic tandem repeats	607	714.667
B9J08_004100T0	eTandem	eTandem-ITR	intragenic tandem repeats	504.333	594
B9J08_004100T0	eTandem	eTandem-ITR	intragenic tandem repeats	358	429.667
B9J08_004100T0	GPI-anchor		GPI-anchoring signal omega site	735	760
B9J08_004892T0	Length	1720
B9J08_004892T0	Pfam	PF15789	Hyphally regulated cell wall GPI-anchored protein 1	499	521
B9J08_004892T0	Pfam	PF15789	Hyphally regulated cell wall GPI-anchored protein 1	527	565
B9J08_004892T0	Pfam	PF15789	Hyphally regulated cell wall GPI-anchored protein 1	577	609
B9J08_004892T0	Pfam	PF15789	Hyphally regulated cell wall GPI-anchored protein 1	706	741
B9J08_004892T0	Pfam	PF15789	Hyphally regulated cell wall GPI-anchored protein 1	794	829
B9J08_004892T0	Pfam	PF15789	Hyphally regulated cell wall GPI-anchored protein 1	1431	1468
B9J08_004892T0	Pfam	PF15789	Hyphally regulated cell wall GPI-anchored protein 1	1341	1375
B9J08_004892T0	Pfam	PF15789	Hyphally regulated cell wall GPI-anchored protein 1	940	977
B9J08_004892T0	Pfam	PF15789	Hyphally regulated cell wall GPI-anchored protein 1	618	653
B9J08_004892T0	Pfam	PF15789	Hyphally regulated cell wall GPI-anchored protein 1	750	785
B9J08_004892T0	Pfam	PF15789	Hyphally regulated cell wall GPI-anchored protein 1	662	697
B9J08_004892T0	Pfam	PF11765	Hyphally-regulated cell wall protein, N-terminal	14	325
B9J08_004892T0	eTandem	eTandem-ITR	intragenic tandem repeats	905	1344.67
B9J08_004892T0	eTandem	eTandem-ITR	intragenic tandem repeats	498.667	894.333
B9J08_004892T0	eTandem	eTandem-ITR	intragenic tandem repeats	369	428.667
B9J08_004892T0	eTandem	eTandem-ITR	intragenic tandem repeats	436.333	490
B9J08_004892T0	SignalP_EUK	SignalP-noTM	Secreted signal	1	21
B9J08_004892T0	GPI-anchor	GPI-anchor	GPI-anchoring signal omega site	1697
B9J08_004109T0	Length	2946
B9J08_004109T0	Pfam	PF15789	Hyphally regulated cell wall GPI-anchored protein 1	1728	1763
B9J08_004109T0	Pfam	PF15789	Hyphally regulated cell wall GPI-anchored protein 1	1874	1911
B9J08_004109T0	Pfam	PF15789	Hyphally regulated cell wall GPI-anchored protein 1	2601	2639
B9J08_004109T0	Pfam	PF15789	Hyphally regulated cell wall GPI-anchored protein 1	1157	1191
B9J08_004109T0	Pfam	PF15789	Hyphally regulated cell wall GPI-anchored protein 1	936	971
B9J08_004109T0	Pfam	PF15789	Hyphally regulated cell wall GPI-anchored protein 1	1640	1675
B9J08_004109T0	Pfam	PF15789	Hyphally regulated cell wall GPI-anchored protein 1	1512	1543
B9J08_004109T0	Pfam	PF15789	Hyphally regulated cell wall GPI-anchored protein 1	1421	1455
B9J08_004109T0	Pfam	PF15789	Hyphally regulated cell wall GPI-anchored protein 1	1464	1499
B9J08_004109T0	Pfam	PF15789	Hyphally regulated cell wall GPI-anchored protein 1	891	927
B9J08_004109T0	Pfam	PF15789	Hyphally regulated cell wall GPI-anchored protein 1	713	751
B9J08_004109T0	Pfam	PF15789	Hyphally regulated cell wall GPI-anchored protein 1	2096	2134
B9J08_004109T0	Pfam	PF15789	Hyphally regulated cell wall GPI-anchored protein 1	1684	1719
B9J08_004109T0	Pfam	PF15789	Hyphally regulated cell wall GPI-anchored protein 1	1772	1807
B9J08_004109T0	Pfam	PF15789	Hyphally regulated cell wall GPI-anchored protein 1	1024	1059
B9J08_004109T0	Pfam	PF15789	Hyphally regulated cell wall GPI-anchored protein 1	1241	1279
B9J08_004109T0	Pfam	PF15789	Hyphally regulated cell wall GPI-anchored protein 1	1595	1631
B9J08_004109T0	Pfam	PF15789	Hyphally regulated cell wall GPI-anchored protein 1	507	531
B9J08_004109T0	Pfam	PF15789	Hyphally regulated cell wall GPI-anchored protein 1	2281	2316
B9J08_004109T0	Pfam	PF15789	Hyphally regulated cell wall GPI-anchored protein 1	627	663
B9J08_004109T0	Pfam	PF15789	Hyphally regulated cell wall GPI-anchored protein 1	1065	1103
B9J08_004109T0	Pfam	PF15789	Hyphally regulated cell wall GPI-anchored protein 1	1288	1323
B9J08_004109T0	Pfam	PF15789	Hyphally regulated cell wall GPI-anchored protein 1	1113	1147
B9J08_004109T0	Pfam	PF15789	Hyphally regulated cell wall GPI-anchored protein 1	1551	1587
B9J08_004109T0	Pfam	PF15789	Hyphally regulated cell wall GPI-anchored protein 1	2234	2272
B9J08_004109T0	Pfam	PF15789	Hyphally regulated cell wall GPI-anchored protein 1	760	795
B9J08_004109T0	Pfam	PF15789	Hyphally regulated cell wall GPI-anchored protein 1	1329	1367
B9J08_004109T0	Pfam	PF15789	Hyphally regulated cell wall GPI-anchored protein 1	802	839
B9J08_004109T0	Pfam	PF15789	Hyphally regulated cell wall GPI-anchored protein 1	1815	1867
B9J08_004109T0	Pfam	PF15789	Hyphally regulated cell wall GPI-anchored protein 1	585	619
B9J08_004109T0	Pfam	PF15789	Hyphally regulated cell wall GPI-anchored protein 1	980	1015
B9J08_004109T0	Pfam	PF11765	Hyphally-regulated cell wall protein, N-terminal	14	325
B9J08_004109T0	SignalP_EUK	SignalP-noTM	Secreted signal	1	21
B9J08_004109T0	eTandem	eTandem-ITR	intragenic tandem repeats	1840	2103.67
B9J08_004109T0	eTandem	eTandem-ITR	intragenic tandem repeats	2395.33	2536
B9J08_004109T0	eTandem	eTandem-ITR	intragenic tandem repeats	348.333	444
B9J08_004109T0	GPI-anchor	GPI-anchor	GPI-anchoring signal omega site	.	.
# Other Hyr/Iff proteins not deleted in B11220
B9J08_001155T0	Length	858
B9J08_001155T0	Pfam	PF11765	Hyphally regulated cell wall protein N-terminal	11	334
B9J08_001155T0	SignalP_EUK	SignalP-noTM	Secreted signal	1	19
B9J08_001155T0	eTandem	eTandem-ITR	intragenic tandem repeats	590	689.667
B9J08_001155T0	eTandem	eTandem-ITR	intragenic tandem repeats	371	487.667
B9J08_001155T0	eTandem	eTandem-ITR	intragenic tandem repeats	701.333	764
B9J08_001155T0	GPI-anchor	GPI-anchor	GPI-anchoring signal omega site	834	858
B9J08_004451T0	Length	717
B9J08_004451T0	Pfam	PF11765	Hyphally regulated cell wall protein N-terminal	16	326
B9J08_004451T0	SignalP_EUK	SignalP-noTM	Secreted signal	1	23
B9J08_004451T0	GPI-anchor	GPI-anchor	GPI-anchoring signal omega site	686	717
B9J08_004110T0	Length	664
B9J08_004110T0	Pfam	PF11765	Hyphally regulated cell wall protein N-terminal	14	327
B9J08_004110T0	SignalP_EUK	SignalP-noTM	Secreted signal	1	21
B9J08_004110T0	GPI-anchor	GPI-anchor	GPI-anchoring signal omega site	641	664

## Sheet: S5. Cauris specific
Supplementary table 5. Candida auris B8441 candidate GPI-anchor C. auris clade specific proteins
# GPI-anchor C. auris clade specific proteins absent in B11220
B9J08_005557T0	Length	184
B9J08_005557T0	SignalP_EUK	SignalP-noTM	Secreted signal	1	18
B9J08_005557T0	GPI-anchor	GPI-anchor	GPI-anchoring signal omega site	161	184
B9J08_005558T0	Length	177
B9J08_005558T0	SignalP_EUK	SignalP-noTM		1	18
B9J08_005558T0	GPI-anchor	GPI-anchor	GPI-anchoring signal omega site	149	177
B9J08_005559T0	Length	166
B9J08_005559T0	SignalP_EUK	SignalP-noTM		1	15
B9J08_005559T0	GPI-anchor	GPI-anchor	GPI-anchoring signal omega site	137	166
B9J08_005560T0	Length	176
B9J08_005560T0	SignalP_EUK	SignalP-noTM		1	15
B9J08_005560T0	GPI-anchor	GPI-anchor	GPI-anchoring signal omega site	146	176
B9J08_005561T0	Length	173
B9J08_005561T0	SignalP_EUK	SignalP-noTM		1	18
B9J08_005561T0	GPI-anchor	GPI-anchor	GPI-anchoring signal omega site	145	173
B9J08_001520T0	Length	293
B9J08_001520T0	SignalP_EUK	SignalP-noTM		1	18
B9J08_001520T0	GPI-anchor	GPI-anchor	GPI-anchoring signal omega site	272	293
B9J08_002244T0	Length	157
B9J08_002244T0	SignalP_EUK	SignalP-noTM		1	15
B9J08_002244T0	GPI-anchor	GPI-anchor	GPI-anchoring signal omega site	137	157
# GPI-anchor C. auris clade specific proteins not deleted in B11220
B9J08_001551T0	Length	149
B9J08_001551T0	SignalP_EUK	SignalP-noTM	Secreted signal	1	17
B9J08_001551T0	GPI-anchor	GPI-anchor	GPI-anchoring signal omega site	124	149
